# Supplementary material for: Enterococcus faecium R0026 Combined with Bacillus subtilis R0179 Prevent Obesity-Associated Hyperlipidemia and Modulate Gut Microbiota in C57BL/6 Mice
Source: PubMed Central journal article supplement (PMC9706029; doi:10.4014/jmb.2009.09005), 2020-10-20
Supplement: jmb-31-2-181-supple.pdf [file jmb-31-2-181-supple.pdf]

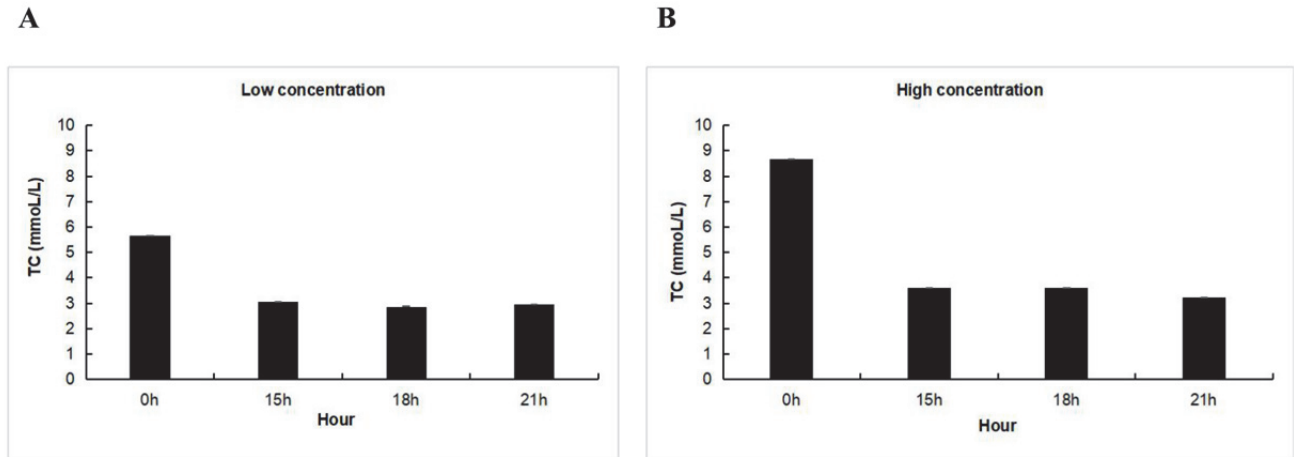

**Supplementary material. 1.** Effect of *Enterococcus faecium* R0026 on high cholesterol in vitro. (A) Low concentration. (B) High concentration.

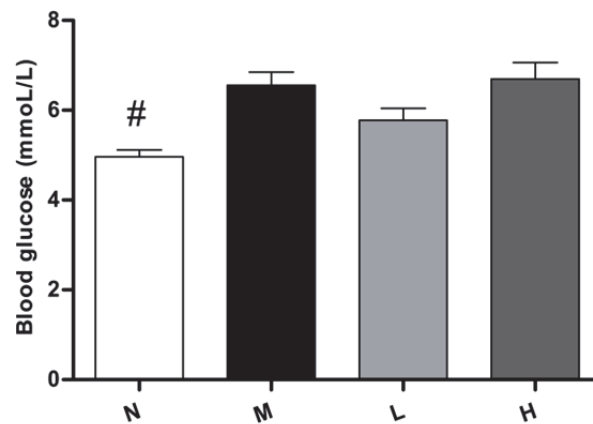

**Supplementary material. 2.** Effect of LCBE in blood glucose. N, normal group; M, model group; L, low dose group; H, high dose group. # $P < 0.05$  the N vs. the M group, \* $P < 0.05$  vs. the M group.

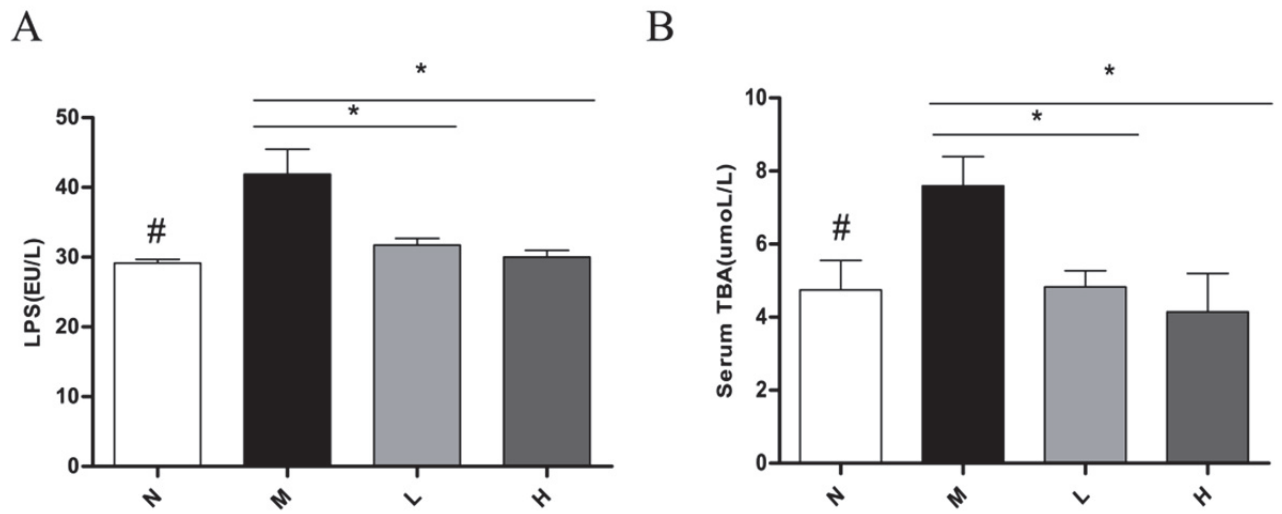

**Supplementary material. 3.** Effect of LCBE in serum inflammatory markers. (A) Serum lipopolysaccharide (LPS). (B) Serum total bile acid (TBA). N, normal group; M, model group; L, low dose group; H, high dose group. <sup>#</sup> $P < 0.05$  the N vs. the M group, <sup>\*</sup> $P < 0.05$  vs. the M group.

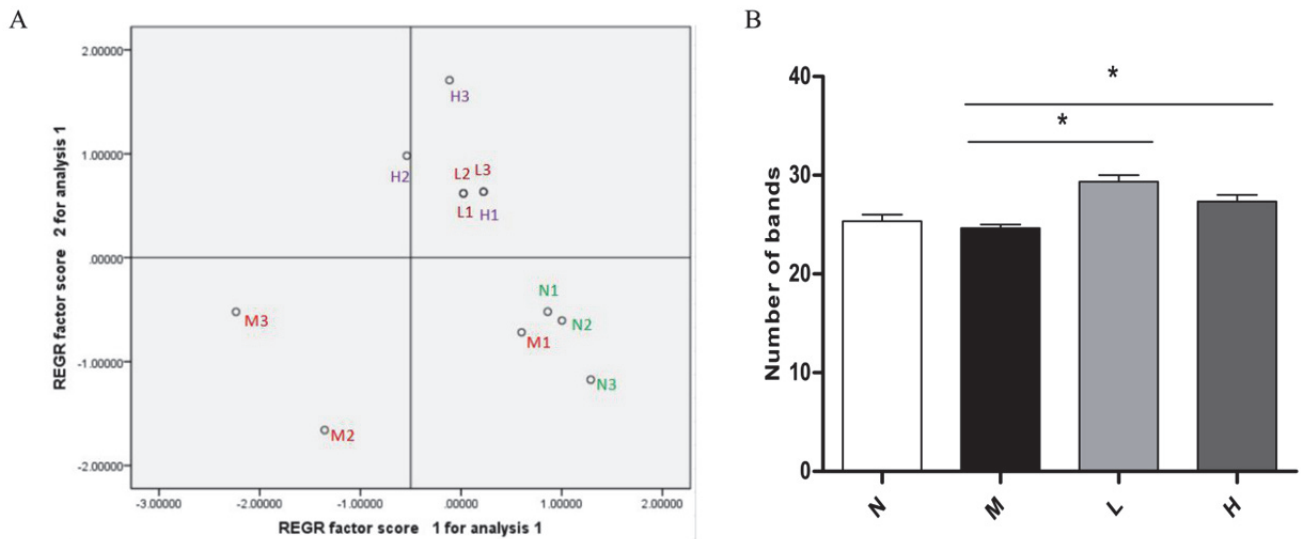

**Supplementary material. 4.** Effect of LCBE in gut microbiota. (A) PCoA of 16S rRNA profiles. (B) Gut microbiota richness measures, number of DGGE bands. N, normal group; M, model group; L, low dose group; H, high dose group. <sup>#</sup> $P < 0.05$  the

N vs. the M group,  $^*P < 0.05$  vs. the M group.

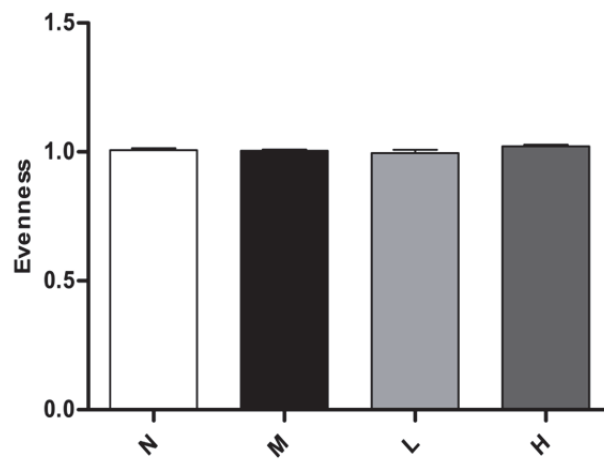

**Supplementary material. 5.** Effect of LCBE in gut microbiota. PCR-DGGE analysis the evenness of the gut microbiota. N, normal group; M, model group; L, low dose group; H, high dose group.  $^{\#}P < 0.05$  the N vs. the M group,  $^*P < 0.05$  vs. the M group.
